# Supplementary material for: The Relative Abundance and Occurrence of Sharks off Ocean Beaches of New South Wales, Australia
Source: MDPI journal article supplement (doi:10.3390/biology11101456), 2022-10-04

## Supporting Information

Table S1: The names and locations of study beaches in New South Wales, Australia, and the surveying periods for drone flights conducted between 2017 – 2021.

| Location         | Beach name       | Location co-ordinates     | Survey periods               |
|------------------|------------------|---------------------------|------------------------------|
| Kingscliff       | Kingscliff       | -28.255125,<br>153.578903 | 4 Nov 2018 –<br>25 Apr 2021  |
| Kingscliff       | South Kingscliff | -28.273453,<br>153.581517 | 24 Sep 2019 –<br>30 Dec 2020 |
| Cabarita         | Cabarita         | -28.331628,<br>153.572042 | 13 Sep 2020 –<br>25 Apr 2021 |
| Byron Bay        | Main             | -28.640769,<br>153.614531 | 28 Dec 2017 –<br>15 Apr 2021 |
| Byron Bay        | The Pass         | -28.636925,<br>153.627922 | 3 Feb 2018 –<br>28 Apr 2019  |
| Suffolk Park     | Suffolk Park     | -28.690917,<br>153.614656 | 3 Feb 2018 –<br>26 Apr 2019  |
| Lennox Head      | Seven Mile       | -28.785224,<br>153.594193 | 3 Feb 2018 –<br>25 Apr 2021  |
| Ballina          | Sharpes          | -28.833919,<br>153.605117 | 4 Feb 2018 –<br>25 Apr 2021  |
| Ballina          | Shelly           | -28.864428,<br>153.593856 | 4 Feb 2018 –<br>24 Apr 2021  |
| Ballina          | Lighthouse       | -28.868550,<br>153.592258 | 10 Feb 2018 –<br>23 Apr 2021 |
| Evans Head       | Airforce         | -29.102372,<br>153.433156 | 3 Apr 2021 –<br>25 Apr 2021  |
| Evans Head       | Main             | -29.111994,<br>153.434939 | 3 Feb 2018 –<br>27 Jan 2021  |
| Yamba            | Main             | -29.435178,<br>153.364764 | 18 Nov 2018 –<br>25 Apr 2021 |
| Woolgoolga       | Woolgoolga       | -30.109186,<br>153.203319 | 20 Dec 2018 –<br>28 Apr 2019 |
| Sawtell          | Sawtell          | -30.368325,<br>153.103200 | 28 Sep 2020 –<br>25 Apr 2021 |
| Urunga           | Hungry Head      | -30.522644,<br>153.028556 | 12 Dec 2020 –<br>27 Jan 2021 |
| Scotts Head      | Scotts Head      | -30.744669,<br>152.996953 | 19 Dec 2020 –<br>27 Jan 2021 |
| South West Rocks | South West Rocks | -30.883297,<br>153.043347 | 20 Dec 2020 –<br>5 Feb 2021  |
| Crescent Head    | Killick          | -31.186519,<br>152.978986 | 17 Nov 2019 –<br>25 Apr 2021 |
| Port Macquarie   | Town             | -31.429797,<br>152.920536 | 12 Mar 2019 –<br>18 Mar 2019 |

|                 |                    |                           |                              |
|-----------------|--------------------|---------------------------|------------------------------|
| Port Macquarie  | Flynns             | -31.442536,<br>152.926233 | 8 Dec 2018 –<br>26 Apr 2020  |
| Port Macquarie  | Lighthouse         | -31.476125,<br>152.933597 | 30 Dec 2018 –<br>25 Apr 2021 |
| Forster         | Main               | -32.177531,<br>152.512414 | 23 Nov 2019 –<br>25 Apr 2021 |
| Hawks Nest      | Bennetts           | -32.673558,<br>152.186017 | 13 Dec 2020 –<br>26 Jan 2021 |
| Anna Bay        | Birubi             | -32.784086,<br>152.075364 | 21 Dec 2018 –<br>25 Apr 2021 |
| Newcastle       | Nobbys             | -32.924617,<br>151.792944 | 27 Sep 2020 –<br>23 Apr 2021 |
| Lake Macquarie  | Redhead            | -33.014144,<br>151.720436 | 4 Nov 2018 –<br>25 Apr 2021  |
| Lake Macquarie  | Blacksmiths        | -33.080125,<br>151.658050 | 22 Nov 2018 &<br>13 Dec 2020 |
| North Entrance  | North Entrance     | -33.334436,<br>151.507025 | 26 Sep 2020 –<br>25 Apr 2021 |
| Avoca           | Avoca              | -33.470342,<br>151.436928 | 9 Dec 2018 –<br>25 Apr 2021  |
| Palm Beach      | Palm Beach         | -33.598889,<br>151.325447 | 26 Sep 2020 –<br>25 Apr 2021 |
| South Narrabeen | South Narrabeen    | -33.722917,<br>151.299572 | 3 Oct 2020 –<br>25 Apr 2021  |
| Dee Why         | Dee Why            | -33.752422,<br>151.297314 | 26 Sep 2020 –<br>24 Apr 2021 |
| Maroubra        | Maroubra           | -33.947550,<br>151.257750 | 28 Sep 2020 –<br>25 Apr 2021 |
| Cronulla        | Wanda              | -34.043639,<br>151.161967 | 27 Sep 2020 –<br>25 Apr 2021 |
| Coledale        | Coledale           | -34.288353,<br>150.948872 | 20 Dec 2020 –<br>26 Jan 2021 |
| Shellharbour    | Shellharbour North | -34.571972,<br>150.868444 | 21 Dec 2020 –<br>26 Jan 2021 |
| Kiama           | Surf               | -34.676197,<br>150.854728 | 1 Dec 2018 –<br>26 Jan 2021  |
| Mollymook       | Mollymook          | -35.338836,<br>150.474503 | 8 Dec 2018 –<br>26 Jan 2021  |
| Malua Bay       | Malua Bay          | -35.793861,<br>150.230339 | 21 Dec 2019 –<br>27 Jan 2021 |
| Tathra          | Tathra             | -36.726817,<br>149.982908 | 20 Dec 2018 –<br>27 Jan 2021 |
| Pambula         | Pambula            | -36.941239,<br>149.910122 | 21 Dec 2018 –<br>27 Jan 2021 |

---

Table S2: Study beach locations and the number of drone flight days per sampling season.

\*Please note: The beach name is only specified if it differs from the location name.

| Location + (Beach name)      | Season 1<br>2017/2018 | Season 2<br>2018/2019 | Season 3<br>2019/2020 | Season 4<br>2020/2021 |
|------------------------------|-----------------------|-----------------------|-----------------------|-----------------------|
| Kingscliff                   | 0                     | 82                    | 2                     | 72                    |
| Kingscliff (South)           | 0                     | 0                     | 99                    | 6                     |
| Cabarita                     | 0                     | 0                     | 0                     | 98                    |
| Byron Bay (The Pass)         | 9                     | 78                    | 0                     | 0                     |
| Byron Bay (Main)             | 7                     | 84                    | 120                   | 42                    |
| Suffolk Park                 | 6                     | 68                    | 0                     | 0                     |
| Lennox Head (Seven Mile)     | 8                     | 83                    | 102                   | 90                    |
| Ballina (Sharpes)            | 8                     | 81                    | 82                    | 61                    |
| Ballina (Shelly)             | 9                     | 61                    | 91                    | 75                    |
| Ballina (Lighthouse)         | 7                     | 62                    | 100                   | 71                    |
| Evans Head (Airforce)        | 0                     | 0                     | 0                     | 12                    |
| Evans Head (Main)            | 6                     | 64                    | 113                   | 61                    |
| Yamba (Main)                 | 0                     | 42                    | 85                    | 96                    |
| Woolgoolga                   | 0                     | 53                    | 0                     | 0                     |
| Sawtell                      | 0                     | 0                     | 0                     | 60                    |
| Urunga (Hungry Head)         | 0                     | 0                     | 0                     | 33                    |
| Scotts Head                  | 0                     | 0                     | 0                     | 38                    |
| South West Rocks             | 0                     | 0                     | 0                     | 32                    |
| Crescent Head (Killick)      | 0                     | 0                     | 50                    | 68                    |
| Port Macquarie (Town)        | 0                     | 2                     | 0                     | 0                     |
| Port Macquarie (Flynnns)     | 0                     | 51                    | 36                    | 0                     |
| Port Macquarie (Lighthouse)  | 0                     | 1                     | 0                     | 59                    |
| Forster (Main)               | 0                     | 0                     | 76                    | 97                    |
| Hawks Nest (Bennetts)        | 0                     | 0                     | 0                     | 28                    |
| Anna Bay (Birubi)            | 0                     | 36                    | 74                    | 50                    |
| Newcastle (Nobbys)           | 0                     | 0                     | 0                     | 64                    |
| Lake Macquarie (Redhead)     | 0                     | 32                    | 72                    | 66                    |
| Lake Macquarie (Blacksmiths) | 0                     | 1                     | 0                     | 1                     |
| North Entrance               | 0                     | 0                     | 0                     | 76                    |
| Avoca                        | 0                     | 59                    | 0                     | 102                   |
| Palm Beach                   | 0                     | 0                     | 0                     | 78                    |
| South Narrabeen              | 0                     | 0                     | 0                     | 62                    |
| Dee Why                      | 0                     | 0                     | 0                     | 63                    |
| Maroubra                     | 0                     | 0                     | 0                     | 65                    |
| Cronulla (Wanda)             | 0                     | 0                     | 0                     | 56                    |
| Coledale                     | 0                     | 0                     | 0                     | 32                    |
| Shellharbour (North)         | 0                     | 0                     | 0                     | 30                    |
| Kiama (Surf)                 | 0                     | 32                    | 19                    | 30                    |
| Mollymook                    | 0                     | 25                    | 14                    | 35                    |
| Malua Bay                    | 0                     | 0                     | 15                    | 34                    |
| Tathra                       | 0                     | 18                    | 22                    | 38                    |
| Pambula                      | 0                     | 29                    | 14                    | 27                    |
| <b>Total</b>                 | <b>60</b>             | <b>1044</b>           | <b>1186</b>           | <b>2008</b>           |

Table S3: Shark observation days, flights days and sightings per day at each beach location. Observation days include all days that a sighting occurred, and a flight day equals 24 hours of continuous flying time. Sightings per unit effort is measured as the ratio of observation days to flight days. Please note: The name of the study beach is only specified if it differs from the location name.

| Location + (Beach name)      | Observation days | Flight days | Sightings per unit effort |
|------------------------------|------------------|-------------|---------------------------|
| Forster (Main)               | 25               | 17.5        | 1.4                       |
| Pambula                      | 4                | 4.8         | 0.8                       |
| Hawks Nest (Bennetts)        | 2                | 2.5         | 0.8                       |
| Crescent Head (Killick)      | 10               | 12.6        | 0.8                       |
| Ballina (Sharpes)            | 12               | 18.2        | 0.7                       |
| Scotts Head                  | 3                | 5.1         | 0.6                       |
| Anna Bay (Birubi)            | 10               | 18.2        | 0.6                       |
| Lennox Head (Seven Mile)     | 13               | 23.8        | 0.5                       |
| Ballina (Lighthouse)         | 8                | 20.6        | 0.4                       |
| Port Macquarie (Lighthouse)  | 2                | 5.6         | 0.4                       |
| Cabarita                     | 4                | 11.8        | 0.3                       |
| Kingscliff                   | 5                | 15.3        | 0.3                       |
| Tathra                       | 2                | 6.3         | 0.3                       |
| Kingscliff (South)           | 3                | 9.5         | 0.3                       |
| Newcastle (Nobbys)           | 2                | 7.1         | 0.3                       |
| Mollymook                    | 2                | 7.2         | 0.3                       |
| Ballina (Shelly)             | 6                | 22.1        | 0.3                       |
| Sawtell                      | 1                | 4.9         | 0.2                       |
| Byron Bay (Main)             | 3                | 19.9        | 0.2                       |
| Kiama (Surf)                 | 1                | 8.4         | 0.1                       |
| Port Macquarie (Flynnns)     | 1                | 8.9         | 0.1                       |
| Evans Head (Main)            | 2                | 23.0        | 0.1                       |
| Avoca                        | 1                | 24.3        | 0.0                       |
| Yamba (Main)                 | 0                | 22.5        | 0.0                       |
| Lake Macquarie (Redhead)     | 0                | 17.0        | 0.0                       |
| Palm Beach                   | 0                | 11.1        | 0.0                       |
| Entrance North               | 0                | 10.6        | 0.0                       |
| South Narrabeen              | 0                | 6.8         | 0.0                       |
| Maroubra                     | 0                | 6.6         | 0.0                       |
| Dee Why                      | 0                | 6.5         | 0.0                       |
| Cronulla (Wanda)             | 0                | 5.9         | 0.0                       |
| Urunga (Hungry Head)         | 0                | 5.0         | 0.0                       |
| Byron Bay (The Pass)         | 0                | 4.5         | 0.0                       |
| Malua Bay                    | 0                | 4.4         | 0.0                       |
| Suffolk Park                 | 0                | 4.2         | 0.0                       |
| Coledale                     | 0                | 4.0         | 0.0                       |
| Shellharbour (North)         | 0                | 4.0         | 0.0                       |
| Woolgoolga                   | 0                | 4.0         | 0.0                       |
| South West Rocks             | 0                | 3.5         | 0.0                       |
| Evans Head (Airforce)        | 0                | 1.2         | 0.0                       |
| Port Macquarie (Town)        | 0                | 0.0         | 0.0                       |
| Lake Macquarie (Blacksmiths) | 0                | 0.0         | 0.0                       |

Figure S1: Total drone flights conducted for each sampling season across all beach locations. Sampling seasons are as follows: one (Sep. 2017 – May 2018), two (Sep. 2018 – May 2019), three (Sep. 2019 – May 2020) and four (Sep. 2020 – May 2021).

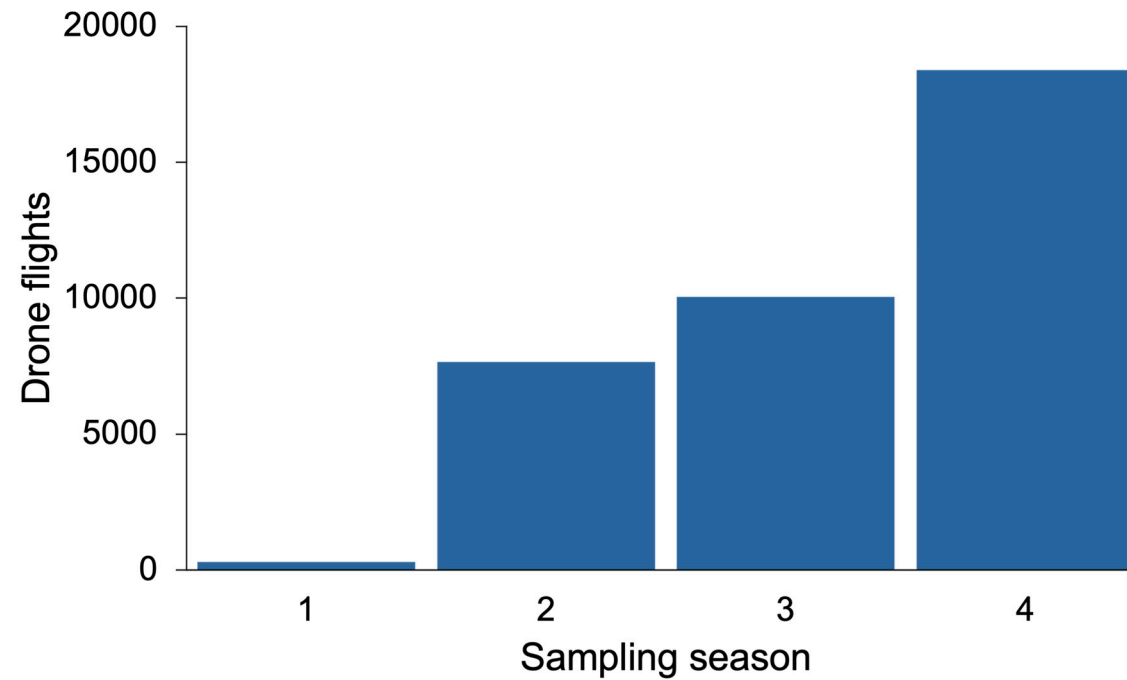

Figure S2: The total number of drone flight days with observations in relation to water clarity classifications (ranging from very poor to very good).

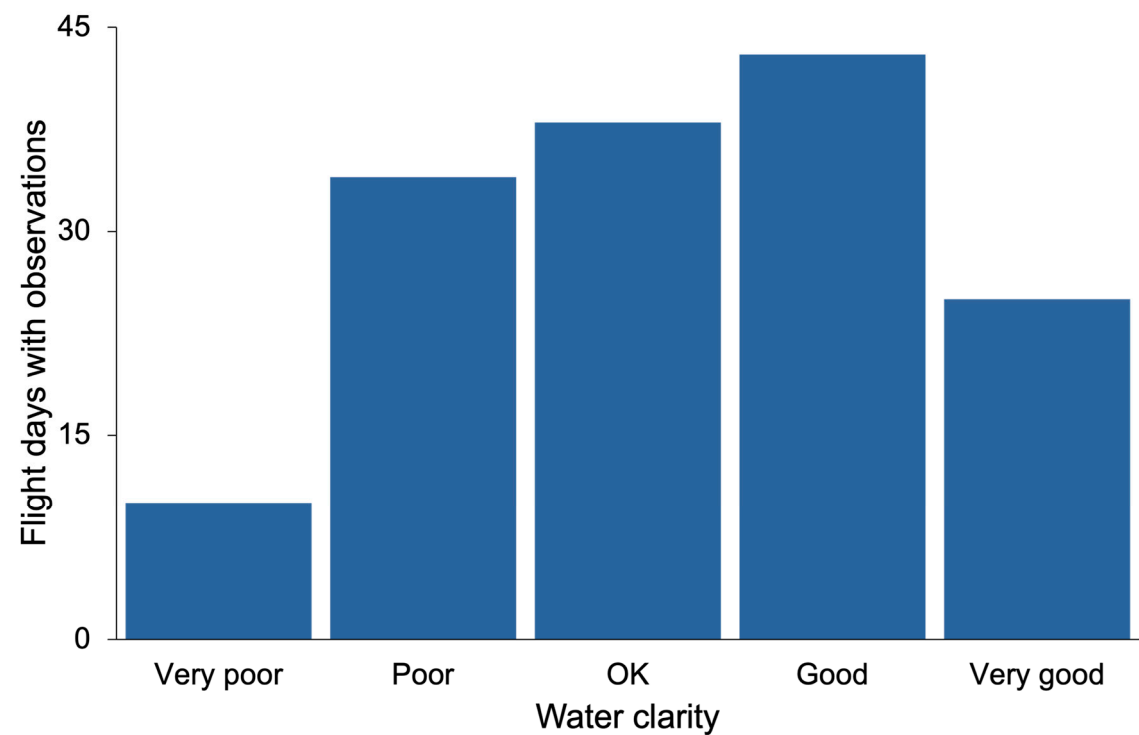

Figure S3: The total number of drone flight days with observations in relation to sea state measured using the Beaufort scale (ranging from 1 to 3).

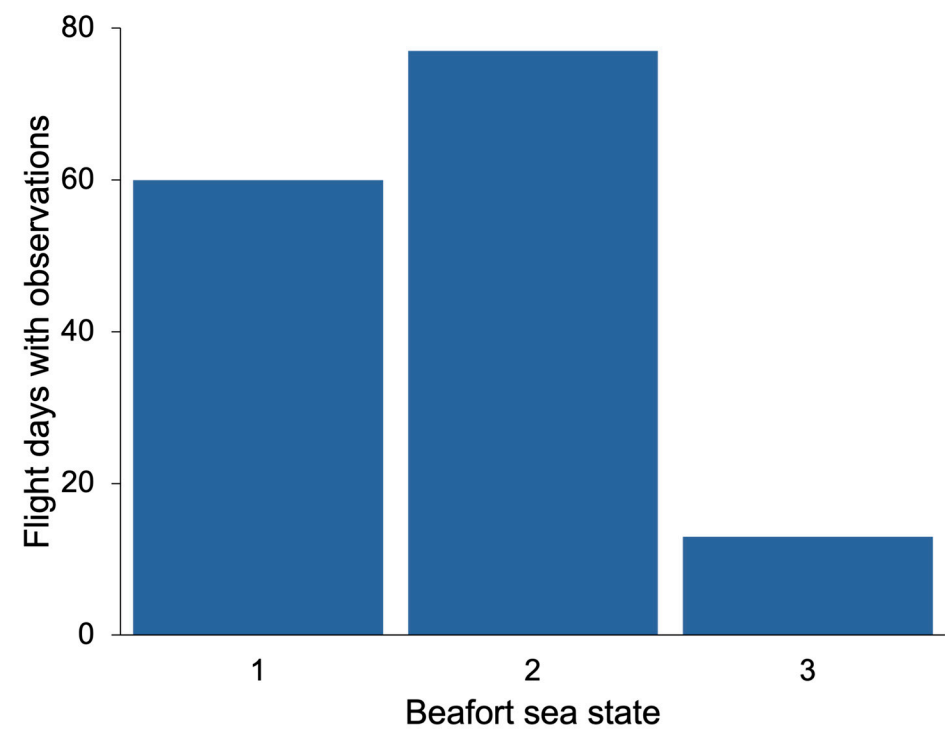

Supplement: s1 [file s1]
